# Supplementary material
Source: PubMed Central journal article supplement (PMC6749832)

# S1. Supporting Information: AHP Results (Year 1)

Looking inside the Black Box: Deconstructing Behavioral Weight Management Interventions in The EARLY Consortium

Tate, D.F., Lytle, L., Polzien, K, Diamond, M., Leonard, K. Jakicic, J., Johnson, K.C, Olson, C., Patrick, K., Svetkey, L., Wing, R., Lin, P., Coday, M., Laska, M.N., Merchant, G., Czaja, S., Schulz, R. & Belle, S.H.

## **Contact Info:**

Deborah F. Tate, PhD

Departments of Health Behavior and Nutrition

Campus Box 7440

Chapel Hill, NC 27599-7440

[dtate@unc.edu](mailto:dtate@unc.edu)

# CHOICES

### Control

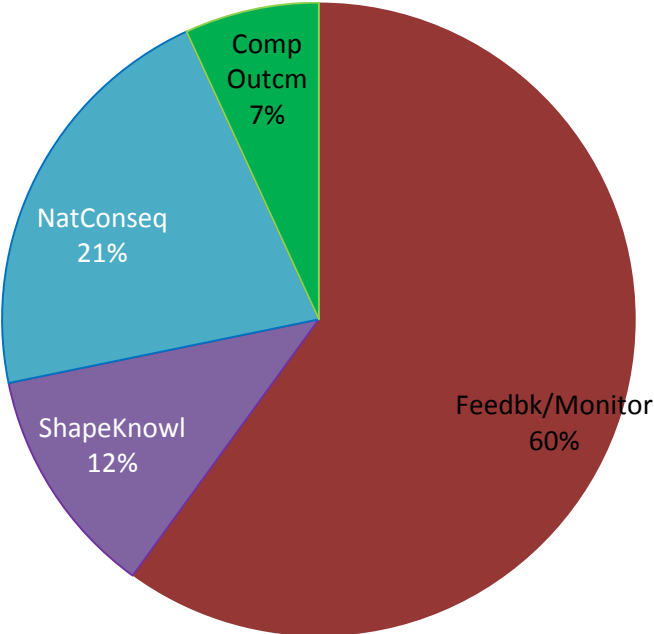

### Intervention

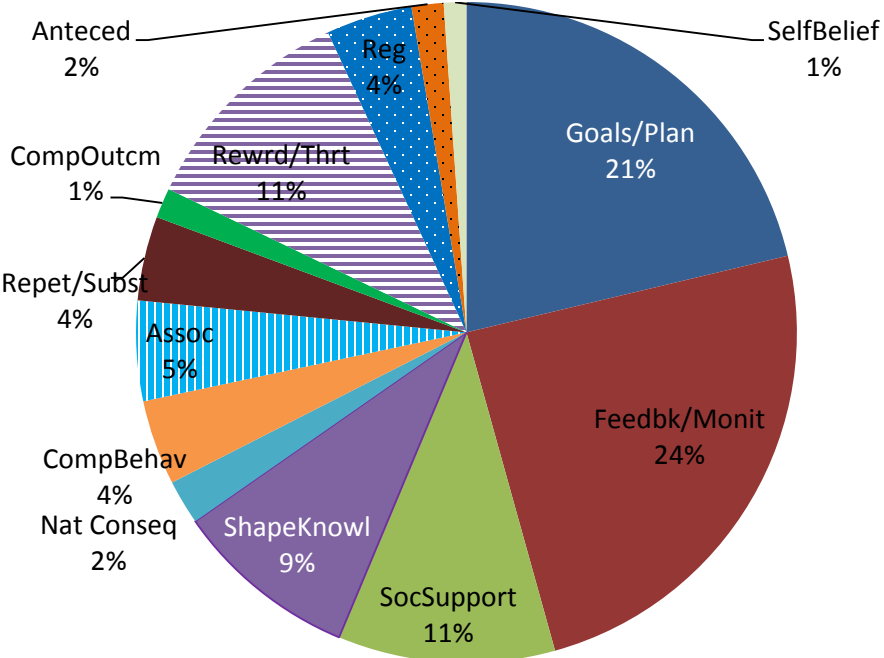

# CITY

## Control

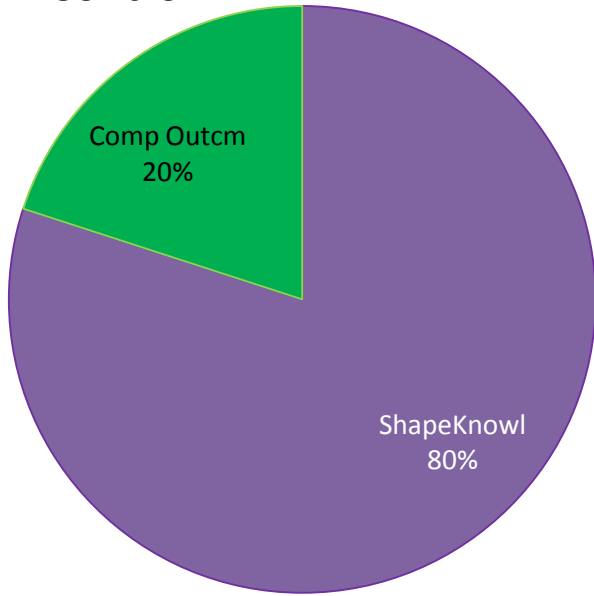

## Cell Phone Intervention

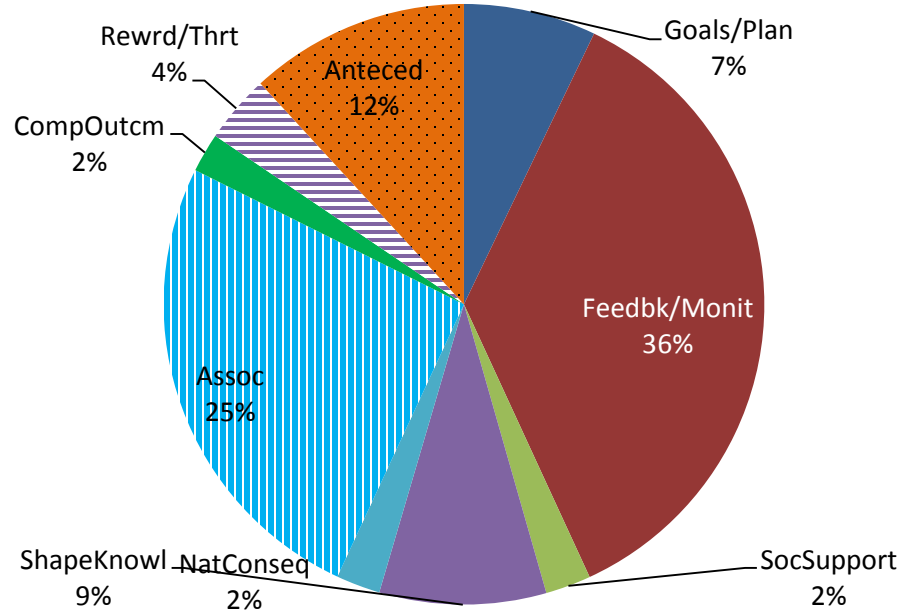

## Coaching Intervention

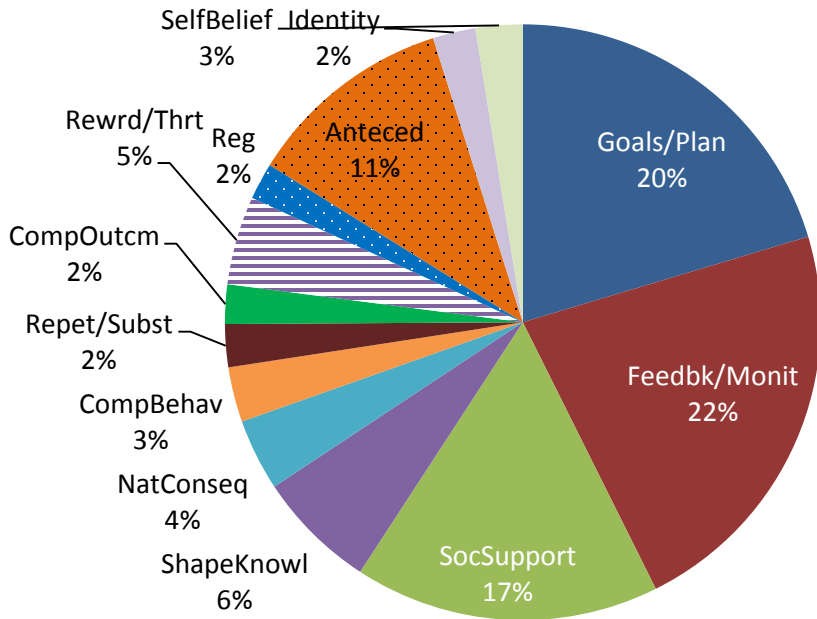

# eMOMS

## Pregnancy and Postpartum Control

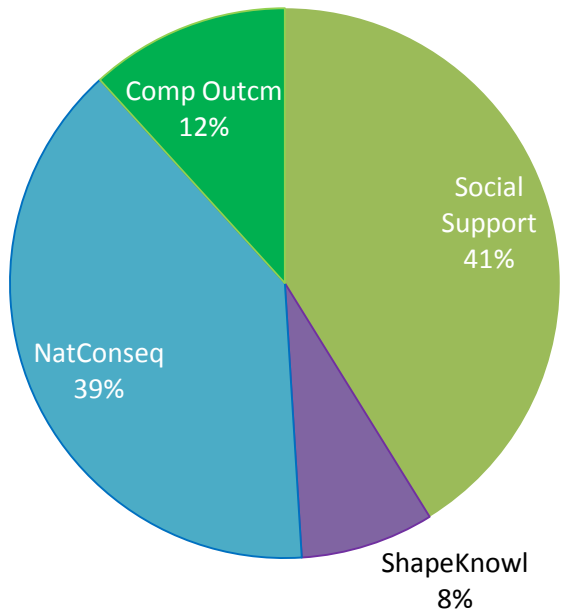

## Pregnancy Intervention Only

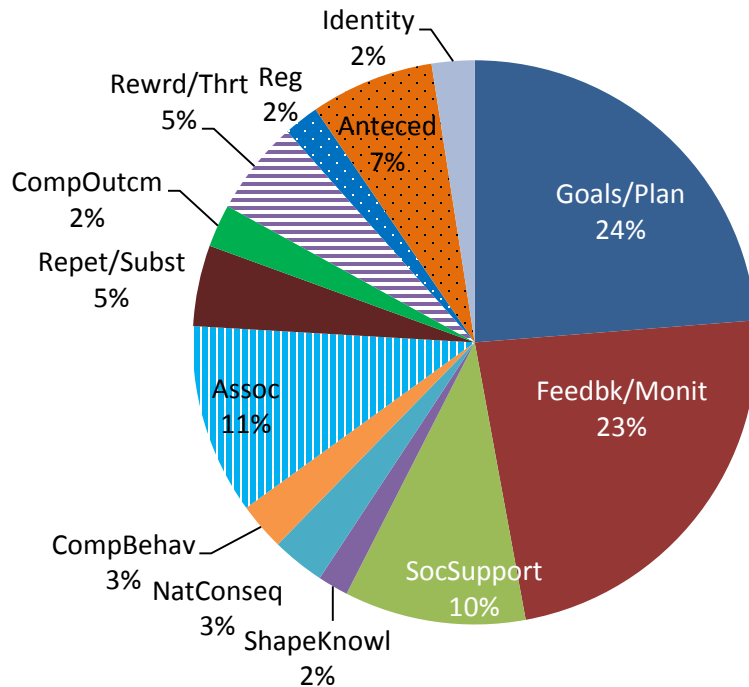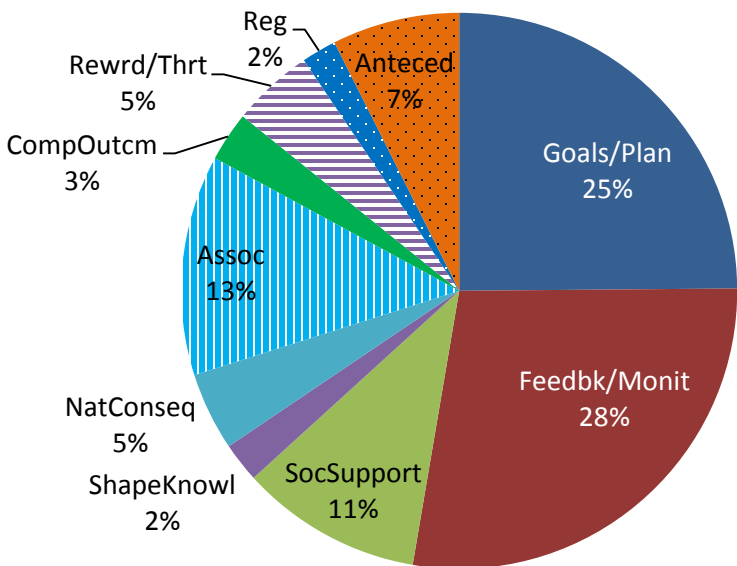

## Pregnancy and Postpartum Intervention

# IDEA

## Standard Intervention

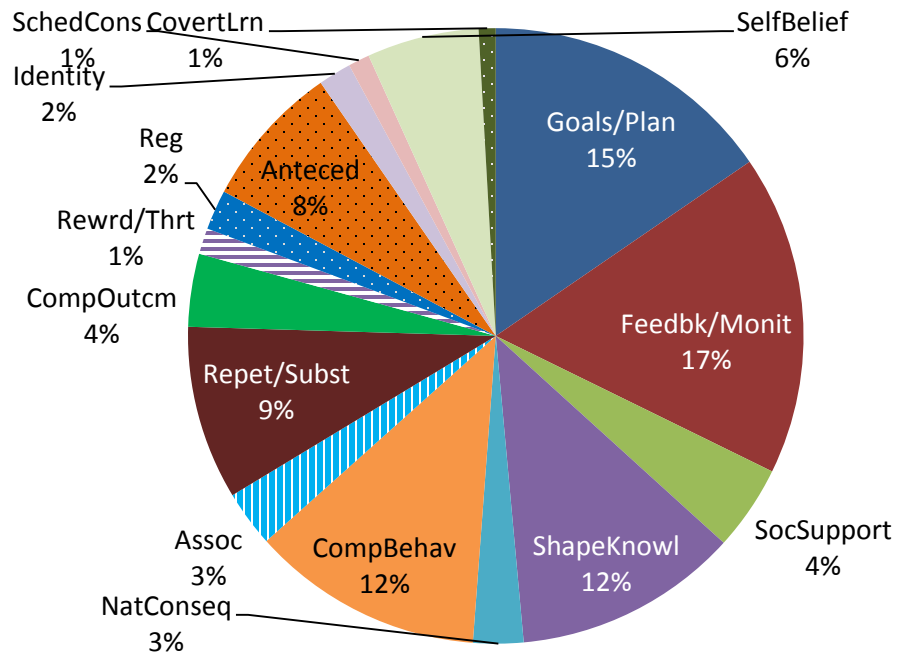

## Enhanced Intervention

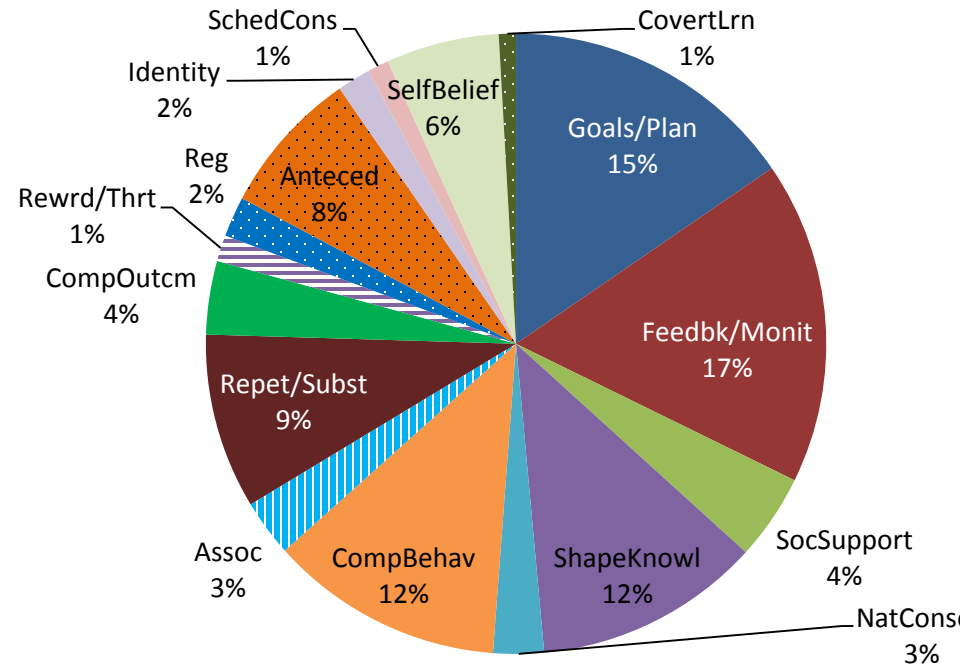

# SMART

Control

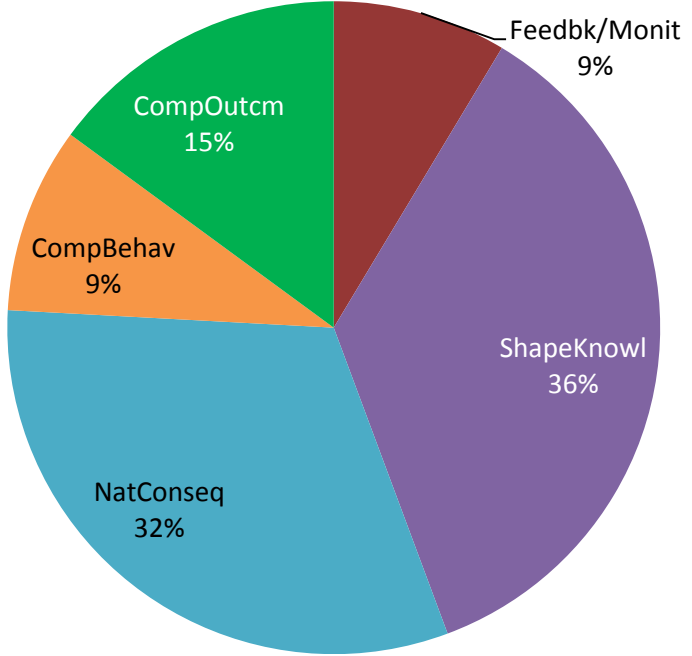

Intervention

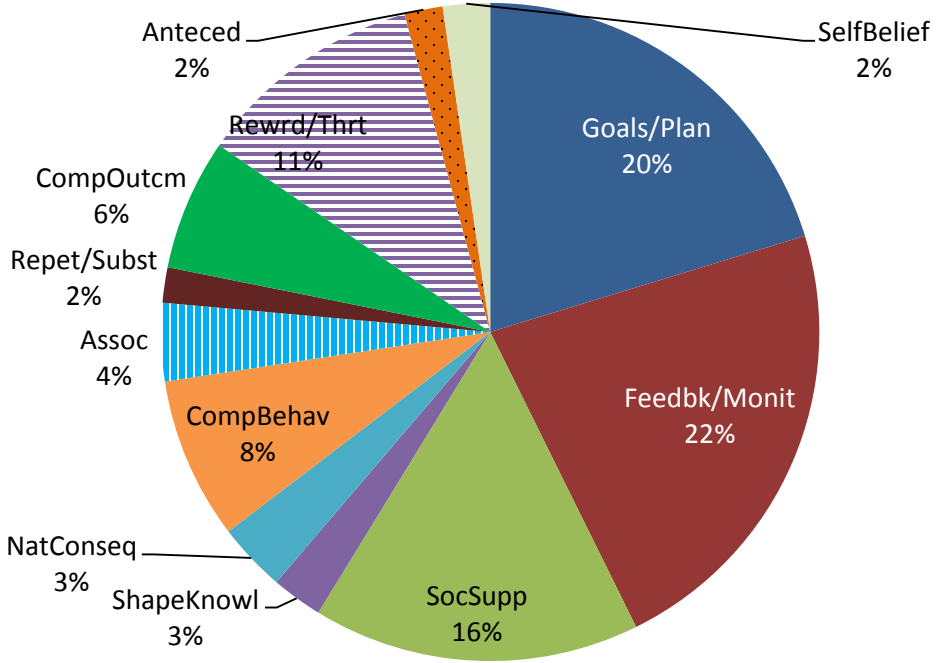

# SNAP

Control

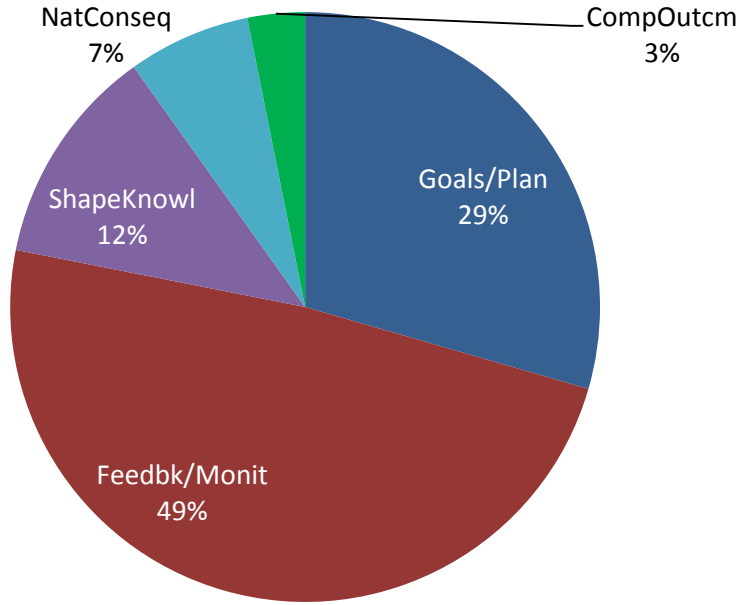

Small Changes Intervention

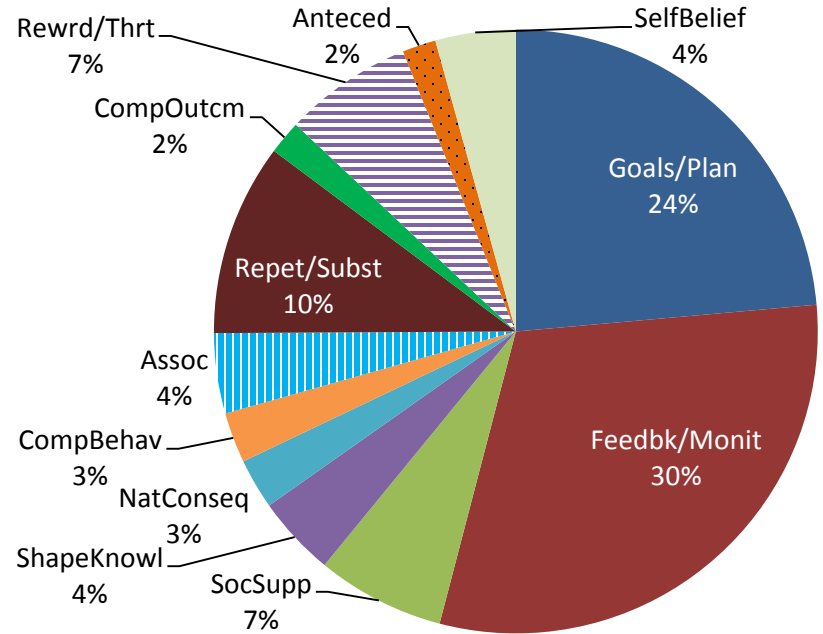

Large Changes Intervention

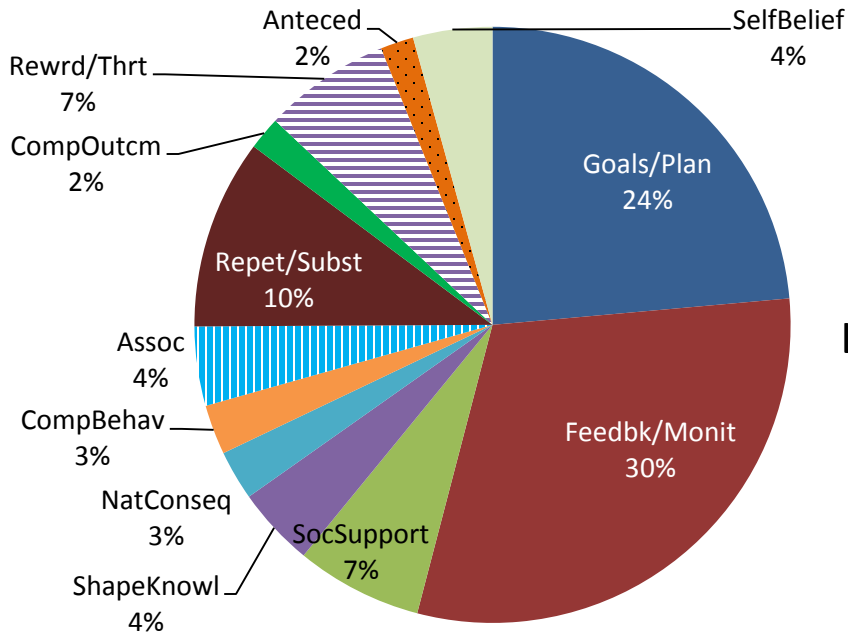

# TARGIT

## Active Control

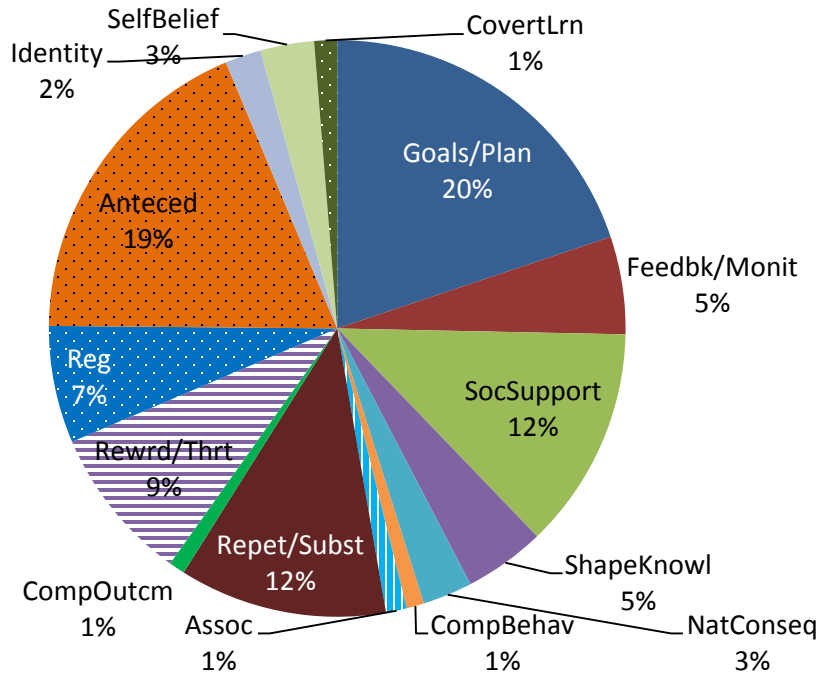

## Intervention

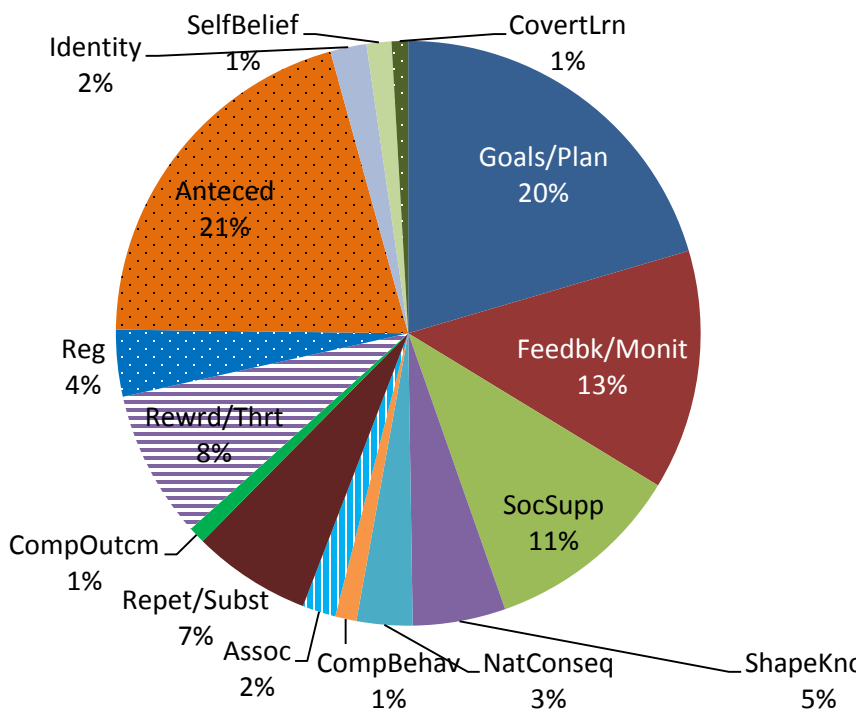

Supplement: NIHMS1526385-supplement-1.pdf [file NIHMS1526385-supplement-1.pdf]
